# Supplementary material
Source: publisher site journal article supplement (https://www.dovepress.com/article/449049)
Supplement: Supplementary file 1 [file get_supplementary_file.php]

## Supplementary figures

**Fig S1.** Enrichment analysis of the common DEGs. A: GO enrichment analysis bubble plot. The color intensity of nodes represents the adjusted p-value, and the node size indicates the number of genes. B: Kyoto Encyclopedia of Genes and Genomes enrichment bubble plot of DEGs.

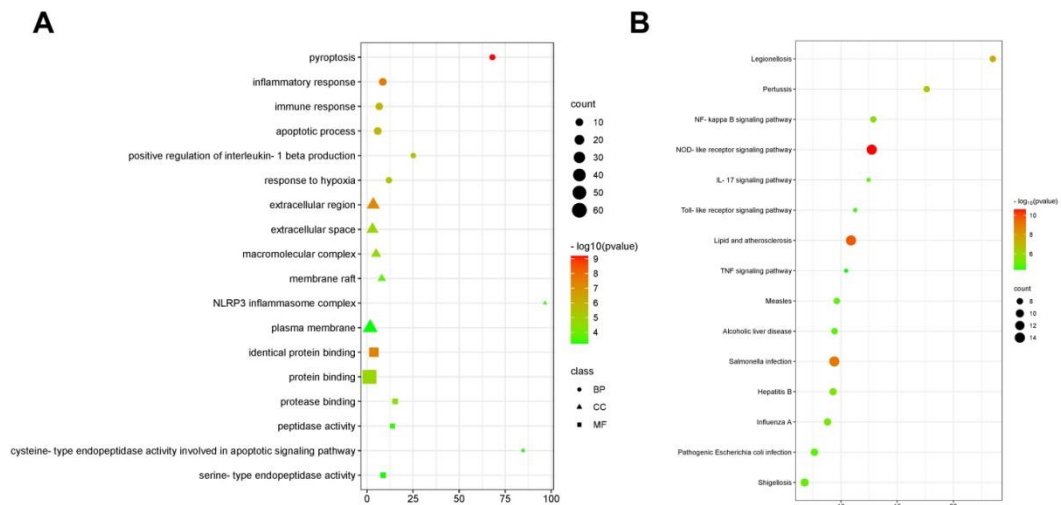

**Fig S2.** Protein–protein interaction network of DEGs.

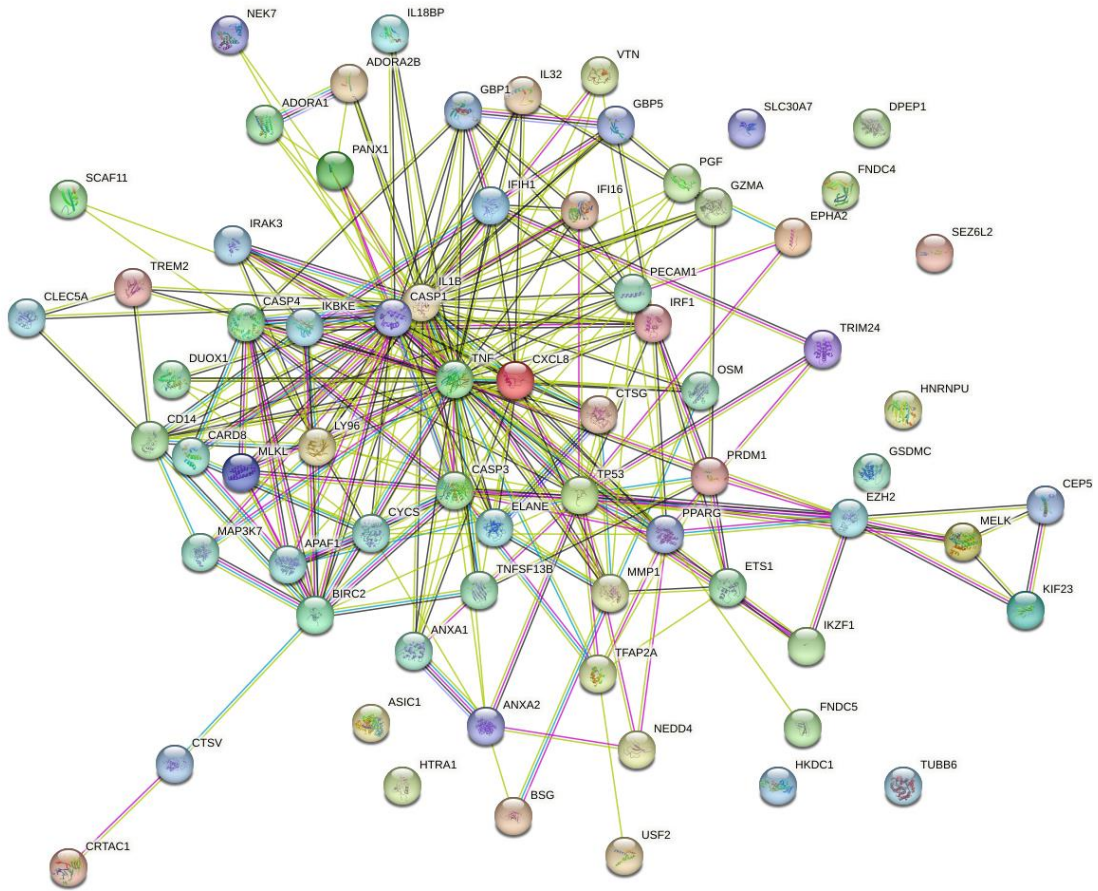

**Table S1 Primer sequence**

| Primers | Sequence (5'-3')      |
|---------|-----------------------|
| GAPDH-F | AACTTTGGCATTGTGGAAGG  |
| GAPDH-R | ACACATTGGGGGTAGGAACA  |
| BIRC2-F | GGGGACAGTCCTGTTGAAAA  |
| BIRC2-R | GGCTAGAGCACAGGTTGGAG  |
| CXCL8-F | GGCAAGATGAGAGTGCACAA  |
| CXCL8-R | AGATGTCCTGGATGGCAAAG  |
| APAF1-F | GTTCAAAGCCGAGACAGGAG  |
| APAF1-R | ATTGACTTGCTCCGAGTGCT  |
| PPARG-F | TTTTCAAGGGTGCCAGTTTC  |
| PPARG-R | AATCCTTGGCCCTCTGAGAT  |
| CYCS-F  | CCAAATCTCCACGGTCTGTT  |
| CYCS-R  | GTCTGCCCTTTCTCCCTTCT  |
| TP53-F  | TACAAGCAAGCACAGGCATC  |
| TP53-R  | CGCTCCACCAAGTTTTTCATT |

**Table S2 The top 25 differentially expressed genes in the GSE60436 dataset**

| <b>Name</b> | <b>Description</b>                 | <b>log2FoldChange</b> | <b>pval</b> | <b>up/down</b> |
|-------------|------------------------------------|-----------------------|-------------|----------------|
| MMP9        | matrix metalloproteinase 9         | 6.79                  | 1.72E-39    | <b>up</b>      |
| COL6A3      | collagen type VI alpha 3 chain     | 5.90                  | 1.85E-35    | <b>up</b>      |
| PRND        | prion protein 2 (dublet)           | 5.36                  | 6.68E-24    | <b>up</b>      |
| ANGPT2      | angiopoietin 2                     | 5.22                  | 8.03E-32    | <b>up</b>      |
| POSTN       | periostin                          | 5.17                  | 3.80E-32    | <b>up</b>      |
| COL1A1      | collagen type I alpha 1 chain      | 5.12                  | 2.28E-35    | <b>up</b>      |
| APLN        | apelin                             | 5.11                  | 4.41E-30    | <b>up</b>      |
| COL5A2      | collagen type V alpha 2 chain      | 5.08                  | 2.30E-34    | <b>up</b>      |
| SERPINE1    | serpin family E member 1           | 5.02                  | 4.59E-34    | <b>up</b>      |
| THBS2       | thrombospondin 2                   | 4.92                  | 3.66E-33    | <b>up</b>      |
| TNC         | tenascin C                         | 4.80                  | 1.46E-31    | <b>up</b>      |
| MMP11       | matrix metalloproteinase 11        | 4.61                  | 6.18E-25    | <b>up</b>      |
| COL4A1      | collagen type IV alpha 1 chain     | 4.55                  | 6.44E-33    | <b>up</b>      |
| C5orf46     | chromosome 5 open reading frame 46 | 4.52                  | 1.59E-28    | <b>up</b>      |
| CST1        | cystatin SN                        | 4.22                  | 1.10E-20    | <b>up</b>      |
| ITGA1       | integrin subunit alpha 1           | 4.20                  | 2.22E-31    | <b>up</b>      |
| COL4A2      | collagen type IV alpha 2 chain     | 4.14                  | 5.54E-29    | <b>up</b>      |

|             |                                                                     |       |          |             |
|-------------|---------------------------------------------------------------------|-------|----------|-------------|
| LOX         | lysyl oxidase                                                       | 4.13  | 3.02E-30 | <b>up</b>   |
| ESM1        | endothelial cell specific molecule 1                                | 4.10  | 1.35E-29 | <b>up</b>   |
| TNFAIP<br>6 | TNF alpha induced protein 6                                         | 4.07  | 3.03E-30 | <b>up</b>   |
| CTHRC1      | collagen triple helix repeat containing 1                           | 4.07  | 7.33E-31 | <b>up</b>   |
| COL5A1      | collagen type V alpha 1 chain                                       | 4.07  | 3.00E-27 | <b>up</b>   |
| FAP         | fibroblast activation protein alpha                                 | 4.06  | 7.53E-31 | <b>up</b>   |
| CDH13       | cadherin 13                                                         | 4.03  | 2.73E-27 | <b>up</b>   |
| LUM         | lumican                                                             | 4.00  | 2.03E-25 | <b>up</b>   |
| SLC45A<br>2 | solute carrier family 45 member 2                                   | -5.06 | 1.70E-34 | <b>down</b> |
| OPTC        | opticin                                                             | -5.11 | 3.94E-33 | <b>down</b> |
| CHRNA<br>3  | cholinergic receptor nicotinic alpha 3 subunit                      | -5.13 | 2.73E-31 | <b>down</b> |
| CLIC6       | chloride intracellular channel 6                                    | -5.14 | 5.23E-30 | <b>down</b> |
| ALDH1A<br>2 | aldehyde dehydrogenase 1 family member<br>A2                        | -5.16 | 7.09E-35 | <b>down</b> |
| TRPM3       | transient receptor potential cation channel<br>subfamily M member 3 | -5.17 | 5.14E-36 | <b>down</b> |
| SCARA5      | scavenger receptor class A member 5                                 | -5.17 | 5.46E-36 | <b>down</b> |
| SLC16A<br>8 | solute carrier family 16 member 8                                   | -5.19 | 3.95E-34 | <b>down</b> |

|             |                                                 |       |          |             |
|-------------|-------------------------------------------------|-------|----------|-------------|
| TYR         | tyrosinase                                      | -5.46 | 3.74E-37 | <b>down</b> |
| PTGDS       | prostaglandin D2 synthase                       | -5.50 | 1.19E-26 | <b>down</b> |
| BCO1        | beta-carotene oxygenase 1                       | -5.58 | 1.19E-36 | <b>down</b> |
| TSPAN1<br>0 | tetraspanin 10                                  | -5.75 | 1.88E-36 | <b>down</b> |
| MLANA       | melan-A                                         | -5.82 | 4.97E-38 | <b>down</b> |
| PCP4        | Purkinje cell protein 4                         | -5.84 | 6.02E-27 | <b>down</b> |
| HMGCS<br>2  | 3-hydroxy-3-methylglutaryl-CoA synthase 2       | -5.91 | 1.76E-37 | <b>down</b> |
| PITX1       | paired like homeodomain 1                       | -5.95 | 1.70E-38 | <b>down</b> |
| FAM150<br>B | family with sequence similarity 150 member<br>B | -5.97 | 5.41E-39 | <b>down</b> |
| PI16        | peptidase inhibitor 16                          | -6.01 | 2.79E-35 | <b>down</b> |
| RLBP1       | retinaldehyde binding protein 1                 | -6.25 | 1.72E-33 | <b>down</b> |
| RPE65       | RPE65, retinoid isomerohydrolase                | -6.47 | 4.43E-40 | <b>down</b> |
| BEST1       | bestrophin 1                                    | -6.65 | 1.65E-40 | <b>down</b> |
| TYRP1       | tyrosinase related protein 1                    | -7.02 | 1.97E-42 | <b>down</b> |
| RGR         | retinal G protein coupled receptor              | -7.07 | 3.98E-38 | <b>down</b> |
| PMEL        | premelanosome protein                           | -7.63 | 4.23E-43 | <b>down</b> |
| TTR         | transthyretin                                   | -8.00 | 3.25E-44 | <b>down</b> |

---
